# Supplementary material for: Preparation and antimicrobial activity of thyme essential oil microcapsules prepared with gum arabic
Source: Royal Society of Chemistry journal article supplement (doi:10.1039/c9ra03323h), 2019-01-01
Supplement: c9ra03323h1.pdf [file c9ra03323h1.pdf]

## Supporting information

### Preparation and antimicrobial activity of thyme essential oil microcapsules prepared with gum arabic

**Chenchen Cai, Ruijia Ma, Mengwen Duan, Dengjun Lu\***

College of Light Industry and Food Engineering, Guangxi University, Nanning 530004, China.

Email: dj6688@gxu.edu.cn

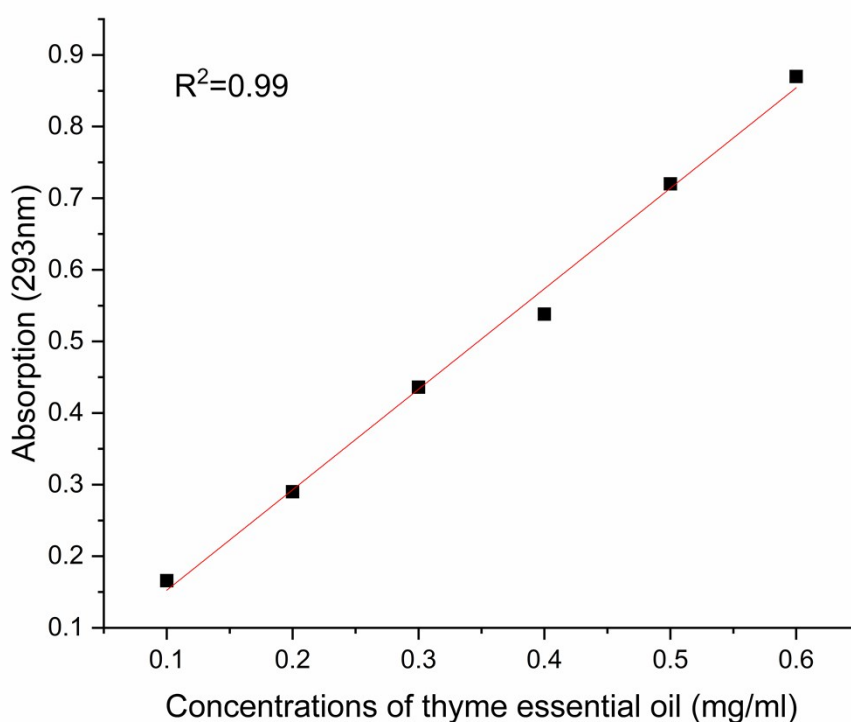

Fig. S1 Linear correlation between the absorbance values (calibration curve) for the peaks at 293 nm and the thyme essential oil concentrations in ethanol.
